# Supplementary material
Source: publisher figshare collection journal article supplement (https://frontiersin.figshare.com/ndownloader/files/16252292)
Supplement: Supplementary file 1 [file 16252292]

## Sheet: Dataset
Sample identification				Soil physico-chemical properties															Soil Phospholipid Fatty Acids (PLFAs)
Site	land use	Kiln/Reference	depth of sampling	OC	Charcoal-C	Uncharred SOC	NPOC	Ntot	C:N	pHH2O	pHKCl	P	Ca	Mg	K	Na	CEC pH 7	BS	C 8:0	C 10:0	C 11:0	C 12:0	C13:0	i C 14:0	C 14:0	i C 15:0	a C15:0	C 15:0	i C 16:0	a C 16:0	C 16:0	10MeC16	i C 17:0	a C 17:0	C16:1c9	C16:1c11	C 17:0	10Me17:0	cy17:0new	C 18:0	10MeC18	i 19:0	C 18:1w9t	C 18:1w9c	C 18:1w7	C 18:1c13	C 18:2t9,12	cy19:0new	C 18:2c9,12
			cm	g/kg	g/kg	g/kg	mg/l	%				mg/kg	cmolc/kg	meq/100g	meq/100g	meq/100g	meq/100g	%	nmol/g	nmol/g	nmol/g	nmol/g	nmol/g	nmol/g	nmol/g	nmol/g	nmol/g	nmol/g	nmol/g	nmol/g	nmol/g	nmol/g	nmol/g	nmol/g	nmol/g	nmol/g	nmol/g	nmol/g	nmol/g	nmol/g	nmol/g	nmol/g	nmol/g	nmol/g	nmol/g	nmol/g	nmol/g	nmol/g	nmol/g
1	cropland	Kiln	0-25	38.4	18.2961	20.1039	11.5407	0.213606	17.9592	5.8	5.1	41.8	19.8962	2.59753	0.377238	0.09	21.526	106.666	0.00566362	0.00327893	0	0.00596748	0.00886156	0.157521	0.0959914	0.72291	0.360306	0.12584	0.429704	0.232455	3.43878	0.862209	0.440379	0.410542	1.82897	0.967134	0.227515	0.0954191	0.413678	0.600365	0.6939	0.0144458	0.170125	1.07047	1.83055	0.169187	0.00356474	0.0117607	0.392536
1	cropland	Reference	0-25	15.5	1.4026	14.0974	11.3685	0.142404	10.8735	6.1	5.9	54.3	13.495	2.293	0.465985	0.0734783	12.8058	127.5	0	0.00733583	0.00112706	0	0.00476137	0.161731	0.0877263	0.768655	0.365635	0.113416	0.436035	0.223705	3.44849	0.745788	0.53344	0.420672	1.90875	1.02421	0.172781	0.079582	0.409413	0.569048	0.550532	0.0141781	0.161279	1.02189	1.85689	0.12407	0.001985	0.0122824	0.451274
2	cropland	Kiln	0-25	31.1	16.156	14.944	10.2486	0.196134	15.8357	6.1	5.4	23.8	11.4147	1.37695	0.396675	0.0521739	13.3615	99.0943	0.00982026	0	0	0.000553014	0.00439369	0.16693	0.122979	0.721454	0.289604	0.124333	0.430297	0.228479	3.27436	0.81329	0.467726	0.334715	1.40439	0.715726	0.209228	0.0977058	0.354395	0.578455	0.60153	0.0131312	0.141173	1.02403	1.77434	0.114532	0.000999247	0.00425889	0.346841
2	cropland	Reference	0-25	14.1	1.90583	12.1942	10.7803	0.117748	11.9878	6.1	5.4	28.6	7.47904	1.14979	0.395396	0.0543478	9.56937	94.8712	0	0.00177138	0.000628339	0.00301471	0.00896552	0.150684	0.0585135	0.517793	0.227409	0.106801	0.289099	0.220936	2.56602	0.574735	0.334015	0.259503	1.13315	0.588841	0.168613	0.0633118	0.272175	0.452256	0.462784	0.00877225	0.115913	0.75918	1.45219	0.110662	0.00186073	0.00383443	0.242504
3	cropland	Kiln	0-25	34.7	16.2811	18.4189	11.5898	0.198536	17.4779	6.56	5.73	5.71346	13.9188	0.155491	1.52016	0.0782303	16.8446	93.0423	0	0.00705523	0	0.00791568	0.00633655	0.212355	0.214021	1.49548	0.547784	0.205016	0.873888	0.240725	4.86608	1.32582	0.908184	0.689843	1.78858	1.21808	0.258153	0.17668	0.579974	0.797057	1.45062	0.0330845	0.247936	1.66528	3.29246	0.159554	0.00305293	0.0226913	0.498259
3	cropland	Reference	0-25	16.4	1.21836	15.1816	10.2095	0.146105	11.2248	6.85	5.78	4.47368	9.3825	0.150248	1.54444	0.039909	10.8874	102.11	0	0	0.000304994	0.00835521	0.0113911	0.165124	0.0889197	1.0307	0.391235	0.153242	0.667338	0.235867	3.71386	0.853399	0.729354	0.486738	1.69313	1.22977	0.215111	0.127728	0.544575	0.619327	0.928539	0.0207902	0.190247	1.45058	2.49623	0.142745	0.00330673	0.0112695	0.503479
4	cropland	Kiln	0-25	20.6	6.97385	13.6261	9.04456	0.137084	15.0272	7.56	7.05	93.232	14.3275	0.467367	1.32305	0.109744	12.3601	131.29	0	0.00207912	0.00071486	0.00507704	0.00490622	0.182003	0.0981902	0.990783	0.335576	0.143831	0.541244	0.239678	3.43197	1.05114	0.574664	0.436877	1.92517	1.07148	0.218971	0.101151	0.489137	0.513082	0.826015	0.0145521	0.179414	1.32303	1.9862	0.166876	0.00150989	0.00719326	0.442641
4	cropland	Reference	0-25	12.1	0.265619	11.8344	8.86134	0.109801	11.02	7.39	6.64	72.3647	9.5325	0.473249	1.15638	0.135495	9.87171	114.444	0.00476895	0.00585242	0	0	0.00662444	0.163944	0.0738846	0.798841	0.290731	0.129506	0.488837	0.223278	2.90275	0.856618	0.560946	0.360629	1.79287	0.993452	0.207109	0.106675	0.402515	0.476574	0.784128	0.0219266	0.145087	1.27377	1.69016	0.125417	0.00500143	0.00657433	0.500665
5	cropland	Kiln	0-25	26.7	9.03312	17.6669	10.01	0.164953	16.1864	8.09	7.5	103.879	22.15	0.550739	0.580247	0.0672472	15.7289	148.441	0	0.00638256	0	0.010345	0.00553853	0.161559	0.0832385	0.706251	0.260559	0.0925531	0.37801	0.236935	2.94224	0.813182	0.484695	0.368201	1.69567	0.965924	0.168843	0.0628409	0.399951	0.459074	0.476425	0.0189673	0.136208	1.13279	1.81179	0.143846	0.00130848	0.00357975	0.410565
5	cropland	Reference	0-25	11.4	0.502111	10.8979	9.61628	0.0979261	11.6414	8.29	7.79	110.701	20.4675	0.529129	0.555967	0.0537412	9.98284	216.435	0	0.0184132	0.000528885	0	0.014692	0.1836	0.116488	0.883244	0.33399	0.121114	0.504039	0.216228	3.42545	0.880766	0.568493	0.402216	2.1778	1.23274	0.192903	0.070176	0.455315	0.542316	0.579672	0.014332	0.16272	1.27604	2.07386	0.143282	0.00207476	0.00280861	0.635211
6	forest	Kiln	0-46	96.1	61.5224	34.5776	16.6683	0.394354	24.36	4	3.3	12.9	1.11277	0.178601	0.17468	0.0778261	29.5256	5.22896	0	7.31264e-05	0	0	0.00478616	0.154361	0.159377	1.77862	0.401035	0.288517	1.92748	0.225263	5.73173	2.00351	1.4663	0.59943	1.52968	0.811894	0.451603	0.576717	0.472977	1.1	1.61138	0.0100404	0.22854	1.55035	2.562	0.104933	0.000874701	0.0104275	0.643884
6	forest	Reference	0-6	69.7	4.45652	65.2435	50.7334	0.445275	15.6449	3.4	3	161.8	1.99701	0.497942	0.270844	0.0695652	17.9213	15.8211	0	0.0116377	0	0.000123637	0.00566081	0.21015	0.490483	4.23746	0.776149	0.606383	6.06172	0.232775	10.7598	4.71184	1.75885	1.14454	2.53329	1.31332	0.788405	1.78702	0.806901	1.91467	3.80756	0.0108819	0.461259	3.37661	3.89512	0.187265	0.000282826	0.0322429	1.20739
7	forest	Kiln	0-59	93	73.7616	19.2384	12.0032	0.341801	27.2208	5	3.8	14.1	8.53343	0.758848	0.156522	0.14913	33.5623	28.5974	0.0012756	0.0062549	0	0.000738793	0.00659906	0.1473	0.0691881	0.696045	0.186228	0.168993	0.675453	0.218292	3.48613	0.904337	0.644585	0.317288	0.955345	0.364179	0.242668	0.196212	0.231937	0.629763	0.974087	0.00504685	0.10629	0.735969	2.24386	0.118102	0.00454295	0	0.376903
7	forest	Reference	0-10	79.3	0	79.3	52.3487	0.501414	15.8119	3.9	3.1	130.6	1.47006	0.425514	0.423274	0.0821739	19.9662	12.0254	0	0.00984368	0	0	0.0190712	0.140304	0.152673	1.54352	0.316294	0.226231	2.73174	0.23433	4.95024	2.68577	0.864667	0.489861	1.23288	0.399262	0.324027	0.899049	0.365954	0.780265	1.83531	0	0.233648	1.97726	1.86684	0.0365855	0.00114047	0.0200911	0.777891
8	forest	Kiln	0-45	85.2	50.4493	34.7507	13.8176	0.306783	27.7767	4.3	3.4	15.9	1.30389	0.282305	0.163427	0.0826087	25.3494	7.22792	0	0.00295791	0	0	0.0062481	0.149922	0.100787	1.19002	0.304576	0.26106	1.79921	0.210686	4.135	1.6295	0.751888	0.435299	1.10712	0.48575	0.339997	0.529794	0.261378	0.831605	1.19003	0.00553637	0.168731	1.39181	1.71741	0.0542285	0	0.0102587	0.539814
8	forest	Reference	0-7	70.6	0.392055	70.2079	56.4087	0.452953	15.5916	4	3.2	100.1	1.97056	0.598354	0.463939	0.0691304	16.2012	19.1466	0.000373874	0.00577806	0.00566557	0.0123426	0.00971476	0.230928	0.489699	4.13145	0.73573	0.709021	6.42262	0.236582	10.3059	4.40519	1.53194	0.990729	3.21218	1.12155	0.700278	1.79655	0.715524	1.6272	3.12097	0	0.431723	4.2903	4.53841	0.197134	0.00278976	0.0508988	1.26676
9	forest	Kiln	0-38	68.4	29.6314	38.7686	25.1676	0.3066	22.3129	4	3.1	43.2	0.688623	0.187654	0.317647	0.0665217	23.8483	5.28527	0.0158247	0.0137863	0	0.0159303	0.0130478	0.172267	0.208394	2.08863	0.346301	0.329673	2.63619	0.238269	5.35027	2.63395	1.28649	0.705633	0.993598	0.446786	0.378532	0.823647	0.339952	0.882268	1.6104	0.00194779	0.109656	1.48424	0.989209	0.0197189	0.00069373	0.0128783	0.34137
9	forest	Reference	0-7	70.2	0	70.2	54.8907	0.506347	13.8598	3.9	3	257.9	1.23703	0.378601	0.412276	0.0691304	19.3485	10.8382	0	0	0	0	0.0138189	0.201744	0.497465	4.76567	0.826722	0.578333	5.145	0.256207	9.83914	4.76353	1.98701	1.18628	2.21714	0.975947	0.609714	1.49151	0.747514	1.554	2.99205	0.0125658	0.298586	3.03153	1.96491	0.0644732	0.00243244	0.021793	0.651051
[truncated: 34 more columns]
